# Supplementary material
Source: Springer Nature journal article supplement (https://www.springermedizin.de/resource/supplementary/12872_2014_829_MOESM5_ESM.pdf/9430614)
Supplement: MOESM5 [file 9430614]

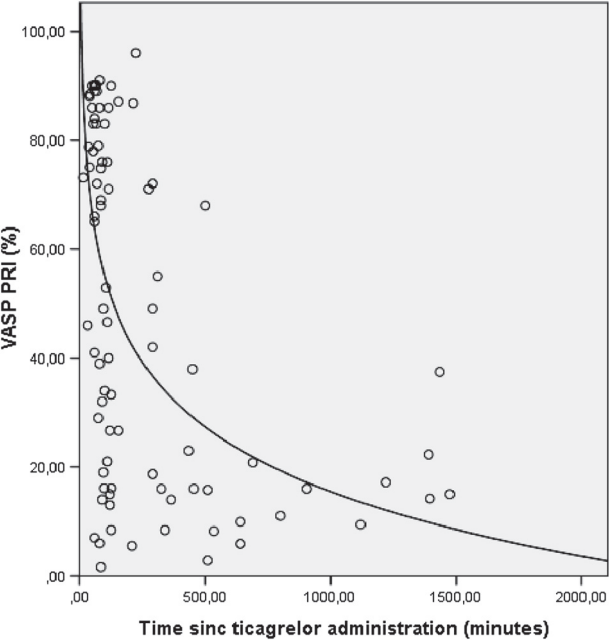

○ Observed

— Logarithmic

$PRI\text{-value} = 134 - 17.2 * (\ln T)$   
( $p < 0.001$ ), where T designates the  
time from ticagrelor administration  
in minutes
